# Supplementary material for: Association of Nap Duration after Lunch with Prevalence of Metabolic Syndrome in a Chinese Government Employee Population
Source: PubMed Central journal article supplement (PMC7344757; doi:10.3390/ijerph17124268), 2020-06-15
Supplement: ijerph-17-04268-s001.pdf [file ijerph-17-04268-s001.pdf]

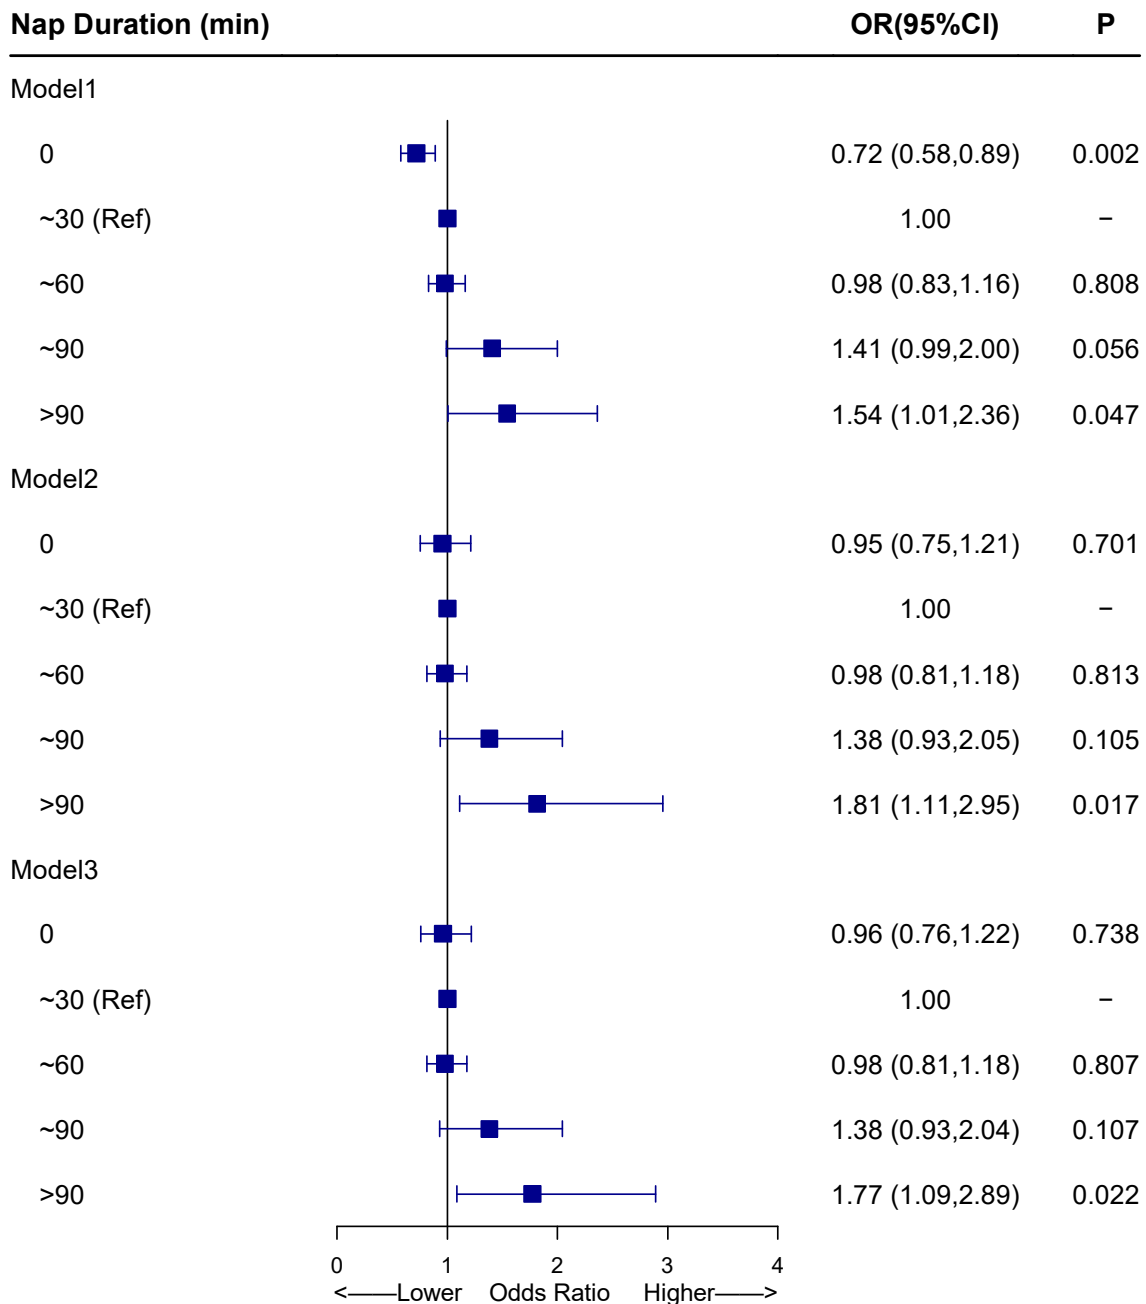

**Figure S1.** The association between nap duration and prevalence of metabolic syndrome by three logistic regression models.

Model 1 was unadjusted. Model 2 was adjusted for demographic factors, lifestyle habits, and mood symptoms. Model 3 was additionally adjusted for sleep-related characteristics. Small squares represent the point estimates of odds ratios and horizontal lines represent 95% CIs. Min, minutes; OR, odds ratio; CI, confidence interval; Ref, reference.

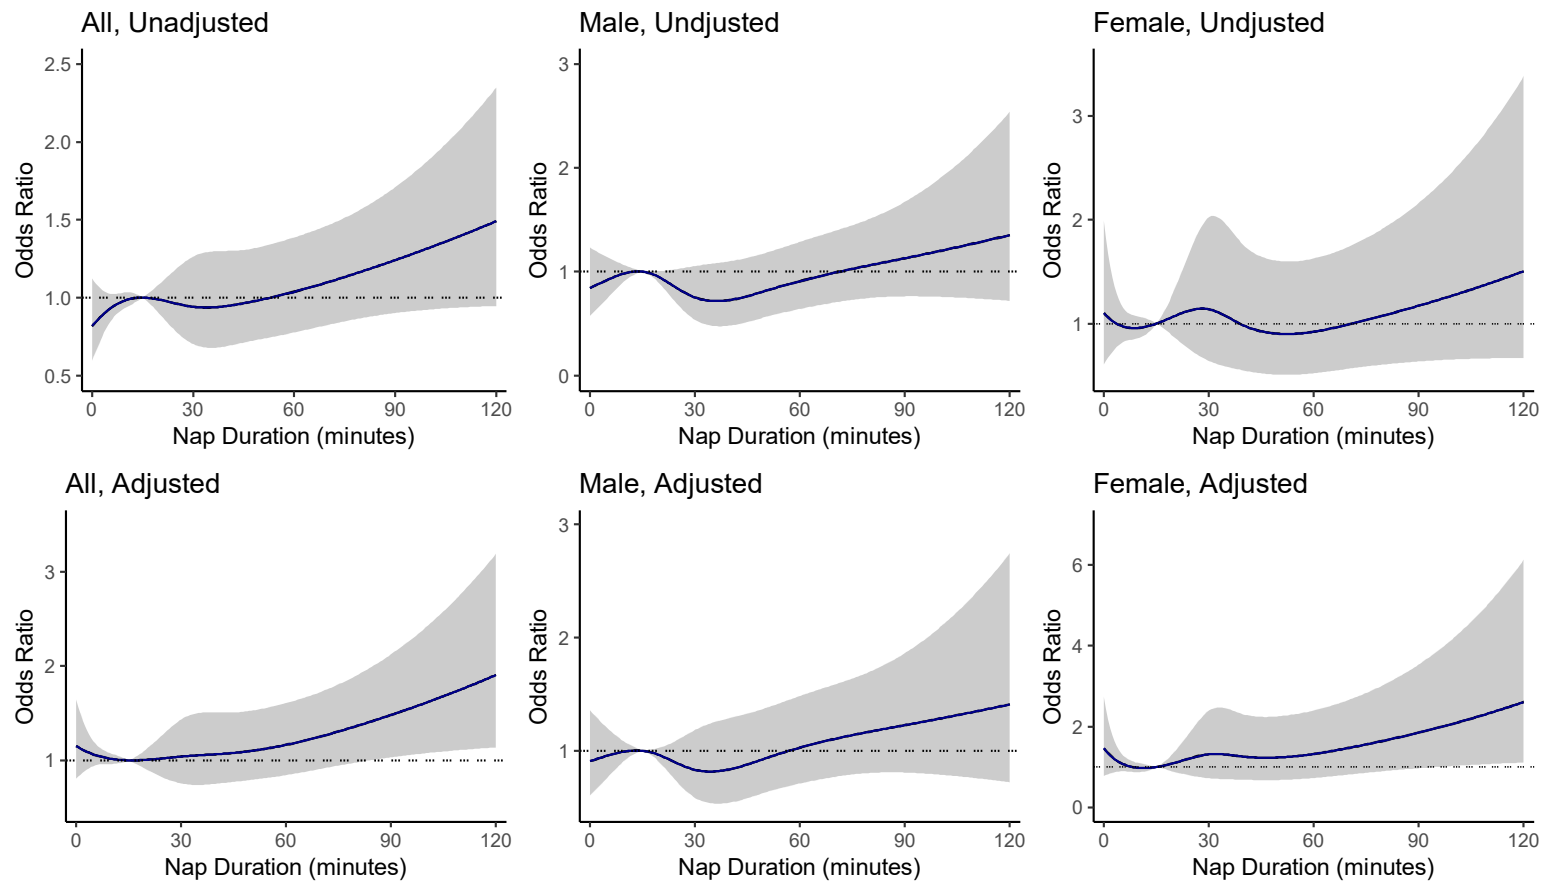

**Figure S2.** The dose-response relationship between nap duration and metabolic syndrome by gender.

Logistic regression models with 5 knots restricted cubic spline functions were adjusted for age, affiliation, marital status, position level, smoking status, drinking status, physical activity, mood symptoms, night sleep duration hours, bedtime at night, use of sleeping medicine, sleep quality, and gender as appropriate. The references were set to 15 minutes. The shadows represent 95% confidence intervals of odds ratios.

**Table S1.** Characteristics of included participants and excluded participants.

| Characteristics                           | Included participants<br>(Available data on<br>variables) | Excluded participants<br>(Missing data on<br>variables) | <i>p</i> |
|-------------------------------------------|-----------------------------------------------------------|---------------------------------------------------------|----------|
| N                                         | 5129                                                      | 1266                                                    |          |
| Age (years), mean (SD)                    | 39.43 (9.31)                                              | 39.67 (9.38)                                            | 0.405    |
| Gender, female (%)                        | 3025 (59.0)                                               | 635 (50.2)                                              | <0.001   |
| Affiliations (%)                          |                                                           |                                                         | <0.001   |
| Government department                     | 370 (7.2)                                                 | 103 (11.5)                                              |          |
| Public institution                        | 3432 (66.9)                                               | 558 (62.3)                                              |          |
| State-owned enterprise                    | 1327 (25.9)                                               | 235 (26.2)                                              |          |
| Marital status (%)                        |                                                           |                                                         | 0.337    |
| Married/cohabitating                      | 4349 (84.8)                                               | 774 (86.6)                                              |          |
| Unmarried                                 | 634 (12.4)                                                | 100 (11.2)                                              |          |
| Divorced/widowed                          | 146 (2.8)                                                 | 20 (2.2)                                                |          |
| Position levels (%)                       |                                                           |                                                         | 0.022    |
| Primary title/staff member/clerk          | 1857 (36.2)                                               | 343 (39.1)                                              |          |
| Intermediate title/section level          | 2103 (41.0)                                               | 371 (42.3)                                              |          |
| Senior title/division level or<br>above   | 1169 (22.8)                                               | 164 (18.7)                                              |          |
| Current smoking (%)                       | 612 (11.9)                                                | 59 (11.5)                                               | 0.829    |
| Current drinking (%)                      | 354 (6.9)                                                 | 348 (39.5)                                              | <0.001   |
| Participating physical activity (%)       | 2985 (58.2)                                               | 536 (59.9)                                              | 0.363    |
| Having mood symptoms (%)                  | 526 (10.3)                                                | 101 (11.5)                                              | 0.295    |
| Night sleep duration(hours), mean<br>(SD) | 7.55 (1.05)                                               | 7.61 (1.08)                                             | 0.145    |
| Using sleeping medication (%)             | 186(3.6)                                                  | 44(5.0)                                                 | 0.062    |
| Night sleep quality (%)                   |                                                           |                                                         | 0.189    |
| Good                                      | 2221 (43.3)                                               | 356 (40.4)                                              |          |
| Fair                                      | 2335 (45.5)                                               | 430 (48.8)                                              |          |
| Bad                                       | 573 (11.2)                                                | 95 (10.8)                                               |          |
| Nap duration (minutes), mean (SD)         | 31.02 (27.43)                                             | 31.73 (29.11)                                           | 0.486    |
| WC (cm), mean (SD)                        | 78.66 (9.68)                                              | 81.77 (10.19)                                           | <0.001   |
| TG (mmol/L), mean (SD)                    | 1.41 (1.39)                                               | 1.67 (1.50)                                             | <0.001   |
| HDL-C (mmol/L), mean (SD)                 | 1.42 (0.32)                                               | 1.44 (0.38)                                             | 0.029    |
| SBP (mmHg), mean (SD)                     | 116.92 (13.74)                                            | 118.88 (13.50)                                          | <0.001   |
| DBP (mmHg), mean (SD)                     | 71.18 (10.55)                                             | 73.17 (11.01)                                           | <0.001   |
| FPG (mmol/L), mean (SD)                   | 5.37 (1.00)                                               | 5.42 (1.04)                                             | 0.124    |

Data were indicated as mean (standard deviation) or number (percentage). *P* was calculated using *t*-test for continuous variables and chi-square test for categorical variables. SD, standard deviation; WC, waist circumference; TG, triglycerides; HDL-C, high-density lipoprotein cholesterol; SBP, systolic blood pressure; DBP, diastolic blood pressure; FPG, fasting plasma glucose.

**Table S2.** Characteristics of participants according to nap duration.

| Characteristics                        | Nap Duration (minutes) |              |              |              |              | <i>p</i> |
|----------------------------------------|------------------------|--------------|--------------|--------------|--------------|----------|
|                                        | 0                      | ~30          | ~60          | ~90          | >90          |          |
| N                                      | 953                    | 2312         | 1551         | 193          | 120          |          |
| Age (years), mean (SD)                 | 38.06 (9.36)           | 40.44 (9.27) | 38.91 (9.16) | 39.05 (9.24) | 37.93 (9.76) | <0.001   |
| Gender, female (%)                     | 680 (71.4)             | 1362 (58.9)  | 817 (52.7)   | 98 (50.8)    | 68 (56.7)    | <0.001   |
| Affiliations (%)                       |                        |              |              |              |              | <0.001   |
| Government department                  | 57 (6.0)               | 172 (7.4)    | 114 (7.4)    | 17 (8.8)     | 10 (8.3)     |          |
| Public institution                     | 750 (78.7)             | 1429 (61.8)  | 1016 (65.5)  | 147 (76.2)   | 90 (75.0)    |          |
| State-owned enterprise                 | 146 (15.3)             | 711 (30.8)   | 421 (27.1)   | 29 (15.0)    | 20 (16.7)    |          |
| Marital status (%)                     |                        |              |              |              |              | <0.001   |
| Married/cohabitating                   | 787 (82.6)             | 2001 (86.5)  | 1303 (84.0)  | 170 (88.1)   | 88 (73.3)    |          |
| Unmarried                              | 144 (15.1)             | 241 (10.4)   | 209 (13.5)   | 18 (9.3)     | 22 (18.3)    |          |
| Divorced/widowed                       | 22 (2.3)               | 70 (3.0)     | 39 (2.5)     | 5 (2.6)      | 10 (8.3)     |          |
| Position levels (%)                    |                        |              |              |              |              | <0.001   |
| Primary title/staff member/clerk       | 412 (43.2)             | 788 (34.1)   | 535 (34.5)   | 74 (38.3)    | 48 (40.0)    |          |
| Intermediate title/section level       | 368 (38.6)             | 950 (41.1)   | 659 (42.5)   | 77 (39.9)    | 49 (40.8)    |          |
| Senior title/division level or above   | 173 (18.2)             | 574 (24.8)   | 357 (23.0)   | 42 (21.8)    | 23 (19.2)    |          |
| Current smoking (%)                    | 96 (10.1)              | 233 (10.1)   | 219 (14.1)   | 39 (20.2)    | 25 (20.8)    | <0.001   |
| Current drinking (%)                   | 48 (5.0)               | 161 (7.0)    | 118 (7.6)    | 20 (10.4)    | 7 (5.8)      | 0.037    |
| Participating physical activity (%)    | 439 (46.1)             | 1429 (61.8)  | 951 (61.3)   | 109 (56.5)   | 57 (47.5)    | <0.001   |
| Having mood symptoms (%)               | 113 (11.9)             | 229 (9.9)    | 145 (9.3)    | 28 (14.5)    | 11 (9.2)     | 0.081    |
| Night sleep duration(hours), mean (SD) | 7.61 (1.14)            | 7.54 (1.00)  | 7.53 (1.01)  | 7.49 (1.17)  | 7.58 (1.28)  | 0.365    |
| Using sleeping medication (%)          | 38(4.0)                | 91(3.9)      | 46(3.0)      | 5(2.6)       | 6(5.0)       | 0.384    |
| Night sleep quality (%)                |                        |              |              |              |              | <0.001   |

| Characteristics                   | Nap Duration (minutes) |                |                |                |                | <i>P</i> |
|-----------------------------------|------------------------|----------------|----------------|----------------|----------------|----------|
|                                   | 0                      | ~30            | ~60            | ~90            | >90            |          |
| Good                              | 374 (39.2)             | 1001 (43.3)    | 706 (45.5)     | 89 (46.1)      | 51 (42.5)      |          |
| Fair                              | 420 (44.1)             | 1088 (47.1)    | 691 (44.6)     | 80 (41.5)      | 56 (46.7)      |          |
| Bad                               | 159 (16.7)             | 223 (9.6)      | 154 (9.9)      | 24 (12.4)      | 13 (10.8)      |          |
| Nap duration (minutes), mean (SD) | 0.00 (0.00)            | 20.30 (11.98)  | 52.68 (8.73)   | 84.86 (7.70)   | 117.17 (17.50) | <0.001   |
| WC (cm), mean (SD)                | 76.90 (9.42)           | 78.73 (9.58)   | 79.22 (9.78)   | 80.67 (9.63)   | 80.72 (10.58)  | <0.001   |
| TG (mmol/L), mean (SD)            | 1.27 (1.14)            | 1.42 (1.32)    | 1.44 (1.51)    | 1.81 (2.14)    | 1.51 (1.25)    | <0.001   |
| HDL-C (mmol/L), mean (SD)         | 1.46 (0.31)            | 1.42 (0.32)    | 1.41 (0.32)    | 1.36 (0.30)    | 1.37 (0.31)    | <0.001   |
| SBP (mmHg), mean (SD)             | 114.62 (13.59)         | 117.22 (13.76) | 117.52 (13.46) | 118.87 (14.25) | 118.74 (15.28) | <0.001   |
| DBP (mmHg), mean (SD)             | 69.17 (10.06)          | 71.64 (10.58)  | 71.48 (10.39)  | 72.55 (11.34)  | 72.19 (12.48)  | <0.001   |
| FPG (mmol/L), mean (SD)           | 5.28 (0.72)            | 5.42 (1.05)    | 5.37 (1.12)    | 5.35 (0.65)    | 5.34 (0.92)    | 0.013    |
| Metabolic syndrome (%)            | 128 (13.4)             | 411 (17.8)     | 271 (17.5)     | 45 (23.3)      | 30 (25.0)      | <0.001   |

Data were indicated as mean (standard deviation) or number (percentage). *P* was calculated using *t*-test for continuous variables and chi-square test for categorical variables. WC, waist circumference; SD, standard deviation; TG, triglycerides; HDL-C, high-density lipoprotein cholesterol; SBP, systolic blood pressure; DBP, diastolic blood pressure; FPG, fasting plasma glucose.

**Table S3.** Sensitivity analyses of adjustment for more variables, multiple imputation, multilevel model, and propensity score stratifying.

| <b>Nap Duration (minutes)</b>                                  | <b>OR</b>   | <b>95% CI of OR</b> | <b><i>p</i></b> |
|----------------------------------------------------------------|-------------|---------------------|-----------------|
| <b>Further adjusted for family history and diet frequency*</b> |             |                     |                 |
| 0                                                              | 0.95        | 0.75-1.21           | 0.697           |
| ~30                                                            | 1.00        | -                   | -               |
| ~60                                                            | 0.98        | 0.81-1.18           | 0.805           |
| ~90                                                            | 1.40        | 0.94-2.08           | 0.097           |
| >90                                                            | <b>1.79</b> | <b>1.08-2.96</b>    | <b>0.024</b>    |
| <b>Multiple imputation method</b>                              |             |                     |                 |
| 0                                                              | 1.00        | 0.81-1.25           | 0.970           |
| ~30                                                            | 1.00        | -                   | -               |
| ~60                                                            | 1.00        | 0.84-1.20           | 0.969           |
| ~90                                                            | 1.39        | 1.00-1.95           | 0.054           |
| >90                                                            | <b>1.69</b> | <b>1.06-2.69</b>    | <b>0.028</b>    |
| <b>Multilevel model**</b>                                      |             |                     |                 |
| 0                                                              | 0.94        | 0.74-1.19           | 0.615           |
| ~30                                                            | 1.00        | -                   | -               |
| ~60                                                            | 0.97        | 0.81-1.17           | 0.749           |
| ~90                                                            | 1.34        | 0.91-1.99           | 0.141           |
| >90                                                            | <b>1.73</b> | <b>1.06-2.82</b>    | <b>0.028</b>    |
| <b>Propensity score stratifying analysis***</b>                |             |                     |                 |
| 0~90                                                           | 1.00        | -                   | -               |
| >90                                                            | <b>1.65</b> | <b>1.08-2.52</b>    | <b>0.020</b>    |

OR, odds ratio; CI, confidence interval.

\*Multivariable logistic regression model was adjusted for age, gender, affiliation, marital status, position level, smoking status, drinking status, physical activity, mood symptoms, night sleep duration hours, bedtime at night, use of sleeping medicine, sleep quality, and further adjusted for family history and diet frequency factors, including family history of hypertension, cancer, and diabetes mellitus, weekly frequency of eating coarse cereals, meat, poultry, aquatic products, egg products, vegetables, dairy products, fruits, and dessert.

\*\*In the multilevel model the individuals were level 1, and organizations were level 2.

\*\*\*Propensity scores were calculated by logistic regression with dependent variable dichotomized by whether the nap duration was greater than 90 minutes and were divided into 6 strata.
